# Supplementary material for: Rapid and Sensitive Analysis of Volatile Components of Different Parts of Clausena lansium by Ionic Liquid Based Headspace Gas Chromatography-Mass Spectrometry
Source: MDPI journal article supplement (doi:10.3390/molecules24010091), 2018-12-27
Supplement: s1 [file s1]

# Rapid and Sensitive Analysis of Volatile Components of Different Parts of *Clausena lansium* by Ionic Liquid Based Headspace Gas Chromatography-Mass Spectrometry

Xiaowen He<sup>1,2,†</sup>, Yinzheng Ma<sup>2,†</sup>, Guohui Yi<sup>3</sup>, Yingying Wen<sup>4</sup>, Yunxia Zhang<sup>3</sup>, Haiying Zhang<sup>3</sup>, Lantong Zhang<sup>1,\*</sup>

## Supplementary Material

**Table S1.** Comparison of peak area percentages and peak numbers in LHK1 when using ILs and water as matrix media by HS-GC-MS.

| Index                                                           | Types of matrix media    |                          |                           |            |
|-----------------------------------------------------------------|--------------------------|--------------------------|---------------------------|------------|
|                                                                 | [Bmim][PF <sub>6</sub> ] | [Bmim][BF <sub>4</sub> ] | [Bmim][NTf <sub>2</sub> ] | Water      |
| Total peak area percentage/<br>Total peak number                | 100.00%/59               | 100.00%/84               | 100.00%/54                | 100.00%/37 |
| Identified peak area percentage/<br>Identified peak number      | 98.07%/52                | 96.77%/62                | 97.44%/41                 | 97.05%/31  |
| Peak area of impurities/<br>Peak number of impurities           | 11.86%/17                | 3.73%/16                 | 3.14%/11                  | 2.95%/9    |
| Peak area without impurities/<br>Peak number without impurities | 86.21%/35                | 92.93%/46                | 94.30%/30                 | 94.10%/22  |
